# Supplementary material for: NS-065/NCNP-01: An Antisense Oligonucleotide for Potential Treatment of Exon 53 Skipping in Duchenne Muscular Dystrophy
Source: PubMed Central journal article supplement — Mol Ther Nucleic Acids. 2018 Sep 27;13:442–9. doi: 10.1016/j.omtn.2018.09.017 (PMC6202794; doi:10.1016/j.omtn.2018.09.017), 2018-09-27
Supplement: mmc1.pdf [file mmc1.pdf]

**OMTN, Volume 13**

**Supplemental Information**

**NS-065/NCNP-01: An Antisense Oligonucleotide  
for Potential Treatment of Exon 53 Skipping  
in Duchenne Muscular Dystrophy**

**Naoki Watanabe, Tetsuya Nagata, Youhei Satou, Satoru Masuda, Takashi Saito, Hidetoshi Kitagawa, Hirofumi Komaki, Kazuchika Takagaki, and Shin'ichi Takeda**

## Supplemental Table

Table S1: Primers for PCR amplification and sequencing

| <i>Direction</i> | <i>Sequences (5'-3')</i>   | <i>Exon</i> | <i>Purpose</i>                                         |
|------------------|----------------------------|-------------|--------------------------------------------------------|
| Forward          | CTG AGT GGA AGG CGG TAA AC | 50          | Detection of exon 53 skipping in RD <sup>a</sup> cells |
| Reverse          | GAA GTT TCA GGG CCA AGT CA | 54          | Detection of exon 53 skipping in RD cells              |
| Forward          | CCT GAG AAT TGG GAA CAT GC | 44          | Detection of exon 53 skipping in Del 45–52 cells       |
| Forward          | AAC CTG GAA AAG AGC AGC AA | 46          | Detection of exon 53 skipping in Del 48–52 cells       |
| Reverse          | TCT CGC TCA CTC ACC CTT TT | 54/55       | Detection of exon 53 skipping in Del 45/48–52 cells    |

<sup>a</sup>RD, Rhabdomyosarcoma
